# Supplementary material for: Hyperechogenic intimal lesions and wall thickness of the temporal and facial arteries in elderly patients with arterial occlusions of the eye
Source: HighWire-hosted journal article supplement (doi:10.1136/rmdopen-2021-001688), 2021-09-01
Supplement: rmdopen-2021-001688supp001_data_supplement.pdf [file rmdopen-2021-001688supp001_data_supplement.pdf]

**SUPPLEMENTARY TABLE 1:****Diagnostic criteria for cranial giant cell arteritis, according to [3,9].**

| <b>Criteria</b> | <b>Description</b>                                                                                                   |
|-----------------|----------------------------------------------------------------------------------------------------------------------|
| <b>1</b>        | Age $\geq$ 50 years                                                                                                  |
| <b>2</b>        | Typical cranial symptoms*                                                                                            |
| <b>3</b>        | Unequivocal symptoms of polymyalgia rheumatica                                                                       |
| <b>4</b>        | Erythrocyte sedimentation rate > 30 mm per one hour <u>or</u> C-reactive protein > 1 mg/dl                           |
| <b>5</b>        | Hypoechogenic wall thickening (halo) of the superficial temporal arteries <u>or</u> positive temporal artery biopsy. |

\*new onset persistent headache, jaw claudication, temporal artery tenderness.
